## Percutaneous edge-to-edge mitral repair in the presence of mitral annulus calcification

E. Fernandez Peregrina<sup>1</sup>, I.P. Pascual<sup>2</sup>, X.F. Freixa<sup>3</sup>, G.T.C. Tirado-Conte<sup>4</sup>, R.R.E. Rodriguez-Estevez<sup>5</sup>, F.C.C. Carrasco-Chinchilla<sup>6</sup>, T.B.G. Benito-Gonzalez<sup>7</sup>, L.A. Asmarats<sup>1</sup>, L.S. Sanchis<sup>3</sup>, P.A. Avanzas<sup>2</sup>, B.C.Q. Caneiro-Queija<sup>5</sup>, F.F.V. Fernandez-Vazquez<sup>7</sup>, J.S.R. Sans Rosello<sup>1</sup>, L.N.F. Nombela-Franco<sup>4</sup>, D.A.A. Arzamendi<sup>1</sup>

<sup>1</sup>Hospital de la Santa Creu i Sant Pau, Cardiology, Barcelona, Spain; <sup>2</sup>Central University Hospital of Asturias, Oviedo, Spain; <sup>3</sup>Barcelona Hospital Clinic, Barcelona, Spain; <sup>4</sup>Hospital Clinico San Carlos, Madrid, Spain; <sup>5</sup>Alvaro Cunqueiro Hospital, Vigo, Spain; <sup>6</sup>University Hospital Virgen de la Victoria, Malaga, Spain; <sup>7</sup>Hospital of Leon, Leon, Spain  
 On behalf of MITRAMAC

**Funding Acknowledgement:** Type of funding sources: None.

**Background:** Mitral annular calcification (MAC) is commonly found in patients affected with mitral regurgitation (MR) and it's associated with high morbidity, mortality and worse cardiac surgical outcomes. Transcatheter edge-to-edge mitral valve repair with the MitraClip system has been established as a valid alternative to surgery in high risk patients with severe MR. However, its efficacy in patients affected with MAC remains uncertain as this population has been excluded from trials.

**Objectives:** To analyze the safety, efficacy and mid-term durability of the treatment of MR with the MitraClip system in patients affected with moderate or severe MAC.

**Methods:** Data was obtained from a multicenter spanish registry that prospectively included consecutive patients with MR grade  $\geq 3$  undergoing transcatheter mitral valve repair with the MitraClip system. Sixty-one patients with moderate or severe MAC were included in the "MAC" group and 791 with no-or-mild MAC were allocated in the "NoMAC" group.

**Results:** Procedural success was similar in both groups (91.8% vs

95.06%,  $p=0.268$ , in MAC and NoMAC respectively) with a very low rate of complications beside a higher residual mean gradient in the MAC group (3.0 vs 3.6mmHg,  $p=0.001$ ). At one-year follow-up, 79.5% of NoMAC and 90.6% of MAC patients had MR grade  $\leq 2$  ( $p=0.129$ ). Only 9 patients (1,14%), all in NoMAC group, required reintervention during follow up. Eighty percent of patients in both groups remained in NYHA functional class  $\leq II$  and a significant reduction in readmissions for heart failure was also observed (65% vs 78% respectively,  $p=0.145$ ). One-year mortality was slightly higher in MAC patients (19.67% vs 11.25%,  $p=0.050$ ) with no difference in cardiovascular mortality (15.25% vs 9.21%,  $p=0.129$ ).

**Conclusions:** Transcatheter edge-to-edge repair with the MitraClip system in selected patients with moderate or severe MAC is safe and feasible with a mid-term durability similar to those without MAC. These patients also benefit clinically from this treatment with a sustained mid-term subjective clinical improvement and no increase in cardiovascular mortality as compared to NoMAC patients.

### CENTRAL ILLUSTRATION Percutaneous edge-to-edge mitral repair in presence of moderate or severe mitral annulus calcification

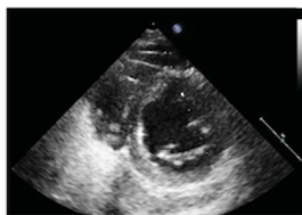

#### A) Immediate results in MAC patients

High procedural success (91.8%)  
 Low rate of complications  
 Higher residual mean gradient in MAC group

#### B) 1-Year Follow-up MR grade and NYHA class in NoMAC and MAC patients

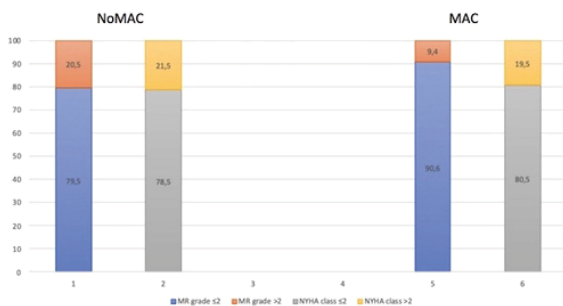

#### C) 1-Year freedom from unplanned cardiac re-hospitalization in NoMAC and MAC patients

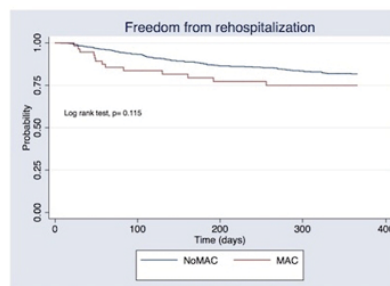

Source: http://academic.oup.com/eurheartj/article-pdf/42/Supplement_1/ehab724.2211/40588699/ehab724.2211.pdf
